# Supplementary material for: Aberrant expression of NKL homeobox gene HLX in Hodgkin lymphoma
Source: PubMed Central journal article supplement (PMC5865674; doi:10.18632/oncotarget.24512), 2018-02-16
Supplement: oncotarget-09-14338-s001.pdf [file oncotarget-09-14338-s001.pdf]

# Aberrant expression of NKL homeobox gene HLX in Hodgkin lymphoma

## SUPPLEMENTARY MATERIALS

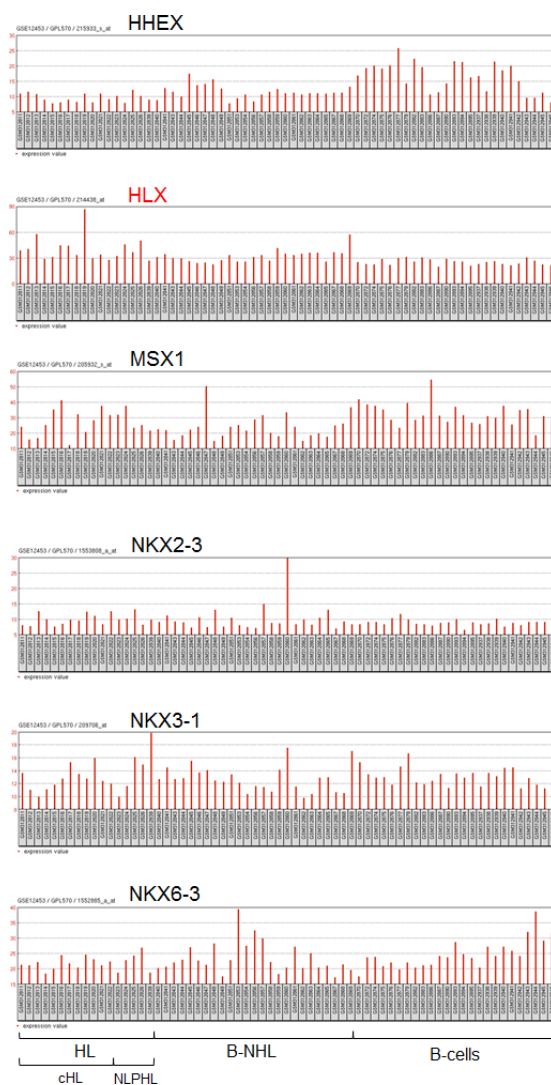

**Supplementary Figure 1: NKL homeobox gene profiling in B-cell lymphoma patients.** Public gene expression profiling dataset GSE12453 contains in addition to 17 microdissected HL cases (12 cHL and 5 NLPHL), 25 B-NHL cases (4 TCRBCL, 5 FL, 5 BL and 11 DLBCL) and 25 normal B-cell samples representing different developmental stages obtained from peripheral blood and tonsils [67]. The transcript levels for six NKL homeobox genes were analyzed in this dataset, demonstrating aberrantly elevated expression of HLX in HL patient samples.

## Activated functions in L-540 (top 1000 overexpressed genes):

| Sublist                  | Category     | Term                                                             | RT | Genes | Count | %      | P-Value | Benjamini |
|--------------------------|--------------|------------------------------------------------------------------|----|-------|-------|--------|---------|-----------|
| <input type="checkbox"/> | KEGG_PATHWAY | <a href="#">Jak-STAT signaling pathway</a>                       | RT | 21    | 3,3   | 1,9E-7 | 4,4E-5  |           |
| <input type="checkbox"/> | KEGG_PATHWAY | <a href="#">Cytokine-cytokine receptor interaction</a>           | RT | 21    | 3,3   | 2,1E-4 | 2,4E-2  |           |
| <input type="checkbox"/> | KEGG_PATHWAY | <a href="#">Transcriptional misregulation in cancer</a>          | RT | 17    | 2,7   | 3,3E-4 | 2,5E-2  |           |
| <input type="checkbox"/> | KEGG_PATHWAY | <a href="#">Proteoglycans in cancer</a>                          | RT | 18    | 2,8   | 8,0E-4 | 4,6E-2  |           |
| <input type="checkbox"/> | KEGG_PATHWAY | <a href="#">ECM-receptor interaction</a>                         | RT | 11    | 1,7   | 1,0E-3 | 4,8E-2  |           |
| <input type="checkbox"/> | KEGG_PATHWAY | <a href="#">Protein digestion and absorption</a>                 | RT | 11    | 1,7   | 1,1E-3 | 4,4E-2  |           |
| <input type="checkbox"/> | KEGG_PATHWAY | <a href="#">PI3K-Akt signaling pathway</a>                       | RT | 25    | 3,9   | 1,3E-3 | 4,4E-2  |           |
| <input type="checkbox"/> | KEGG_PATHWAY | <a href="#">Hematopoietic cell lineage</a>                       | RT | 10    | 1,6   | 3,3E-3 | 9,2E-2  |           |
| <input type="checkbox"/> | KEGG_PATHWAY | <a href="#">Adipocytokine signaling pathway</a>                  | RT | 9     | 1,4   | 3,4E-3 | 8,5E-2  |           |
| <input type="checkbox"/> | KEGG_PATHWAY | <a href="#">Amoebiasis</a>                                       | RT | 11    | 1,7   | 4,6E-3 | 1,0E-1  |           |
| <input type="checkbox"/> | KEGG_PATHWAY | <a href="#">Hypertrophic cardiomyopathy (HCM)</a>                | RT | 9     | 1,4   | 6,6E-3 | 1,3E-1  |           |
| <input type="checkbox"/> | KEGG_PATHWAY | <a href="#">Pathways in cancer</a>                               | RT | 25    | 3,9   | 7,1E-3 | 1,3E-1  |           |
| <input type="checkbox"/> | KEGG_PATHWAY | <a href="#">Measles</a>                                          | RT | 12    | 1,9   | 8,1E-3 | 1,4E-1  |           |
| <input type="checkbox"/> | KEGG_PATHWAY | <a href="#">Rap1 signaling pathway</a>                           | RT | 16    | 2,5   | 8,3E-3 | 1,3E-1  |           |
| <input type="checkbox"/> | BIOCARTA     | <a href="#">IL22 Soluble Receptor Signaling Pathway</a>          | RT | 5     | 0,8   | 5,4E-3 | 6,2E-1  |           |
| <input type="checkbox"/> | BIOCARTA     | <a href="#">NO2-dependent IL_12 Pathway in NK cells</a>          | RT | 5     | 0,8   | 1,5E-2 | 7,4E-1  |           |
| <input type="checkbox"/> | BIOCARTA     | <a href="#">IL-2 Receptor Beta Chain in T cell Activation</a>    | RT | 7     | 1,1   | 2,4E-2 | 7,7E-1  |           |
| <input type="checkbox"/> | BIOCARTA     | <a href="#">Chaperones modulate interferon Signaling Pathway</a> | RT | 4     | 0,6   | 9,7E-2 | 9,9E-1  |           |
| <input type="checkbox"/> | BIOCARTA     | <a href="#">Role of Tob in T-cell activation</a>                 | RT | 4     | 0,6   | 9,7E-2 | 9,9E-1  |           |

**Supplementary Figure 2: Gene-annotation enrichment analysis data (DAVID).** The top 1000 overexpressed genes in L-540 as compared to five control HL cell lines were analyzed using the online tool DAVID provided by the National Institute of Health. The results show significantly high representation of KEGG-pathway term JAK-STAT signaling pathway (arrow head) in addition to further four terms of other signaling pathways from KEGG-pathway and BIOCARTA (arrows).

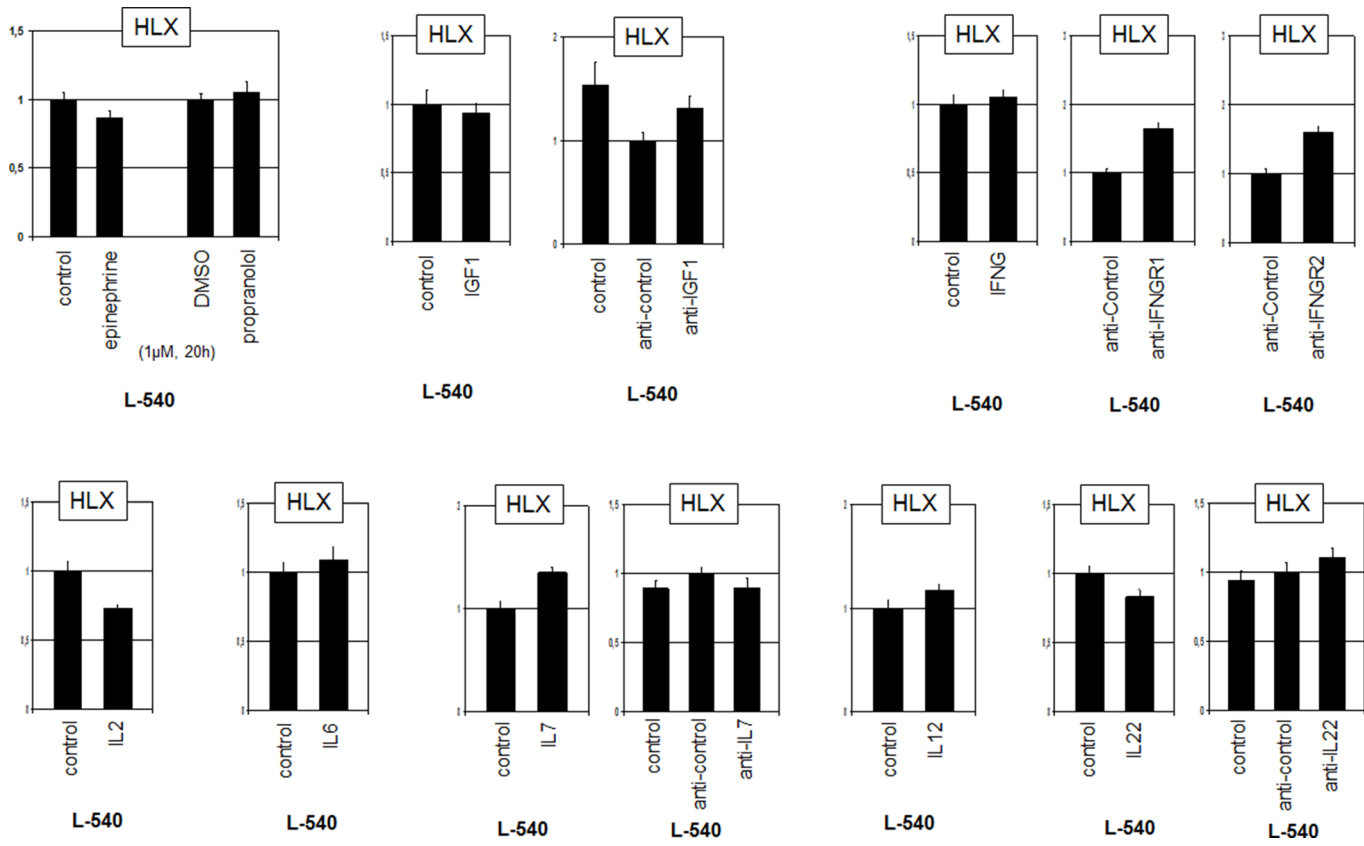

**Supplementary Figure 3: Treatments of HL cell line.** HL cell line L-540 was treated with two drugs activating/inhibiting adrenoceptor signaling, with different recombinant receptor-ligands, and with inhibitory antibodies directed against particular ligands or receptors. The expression of HLX was subsequently quantified by RQ-PCR. However, no significant alteration was detected which would have indicated HLX activation.

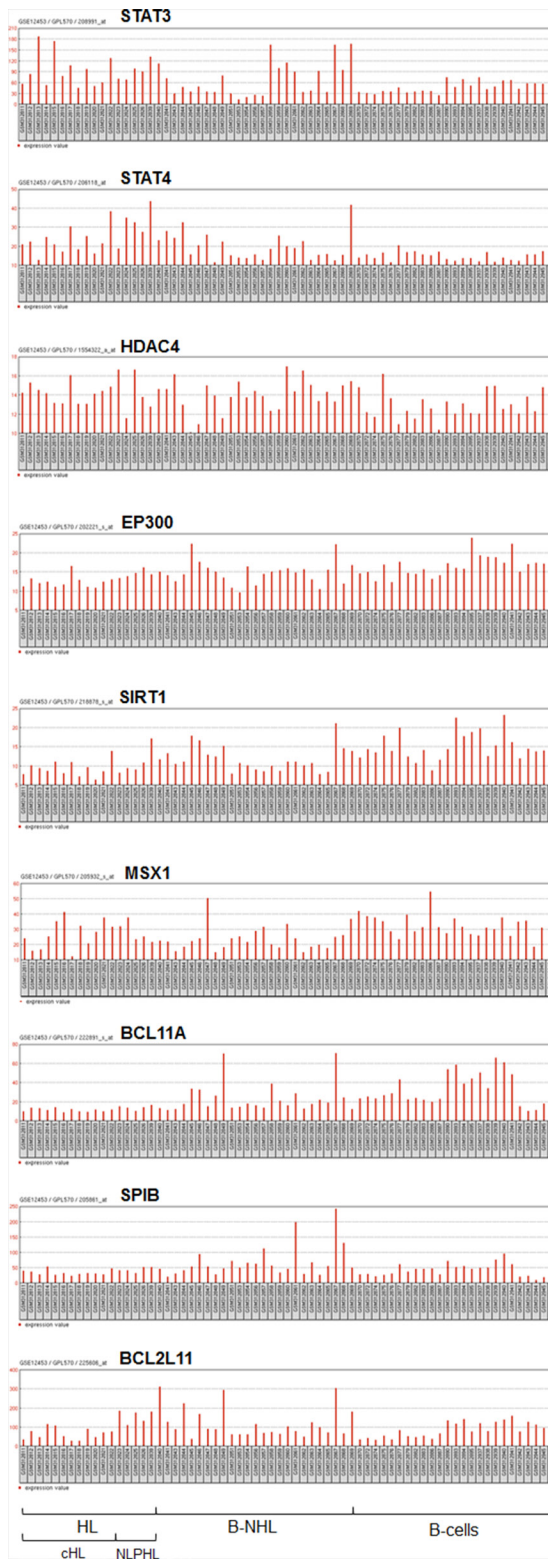

**Supplementary Figure 4: Gene expression profiling data in HL patients.** Public gene expression profiling dataset GSE12453 contains in addition to 17 microdissected HL cases (12 cHL and 5 NLPHL), 25 B-NHL cases (4 TCRBCL, 5 FL, 5 BL and 11 DLBCL) and 25 normal B-cell samples representing different developmental stages obtained from peripheral blood and tonsils [67]. The transcript levels for potential upstream regulators and downstream target genes of HLX were analyzed in this dataset.

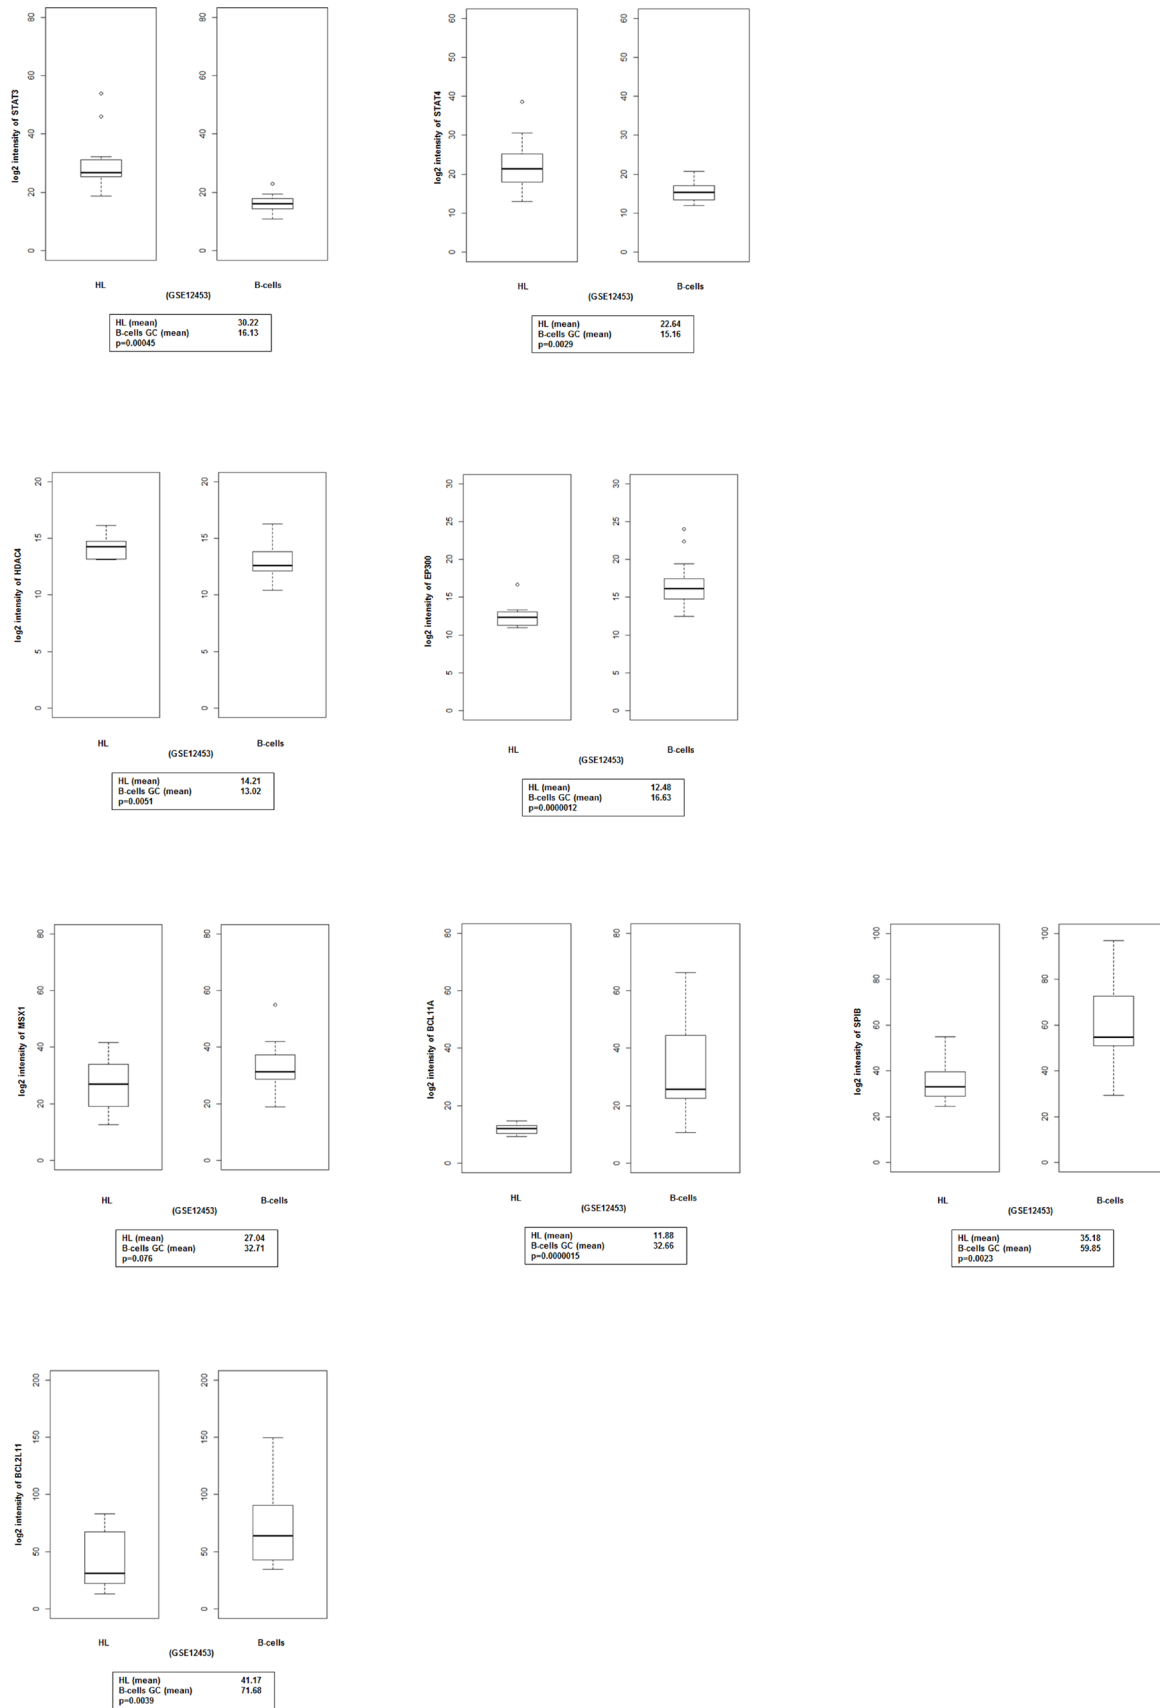

**Supplementary Figure 5: Gene expression statistics.** Expression data of 17 HL patient samples and of 25 B-cell controls obtained from public gene expression profiling dataset GSE12453 were analyzed for potential upstream regulators and downstream target genes of HLX. The expression levels are indicated as boxplot and the statistical significance of expression level differences were analyzed by Student's *T*-test – the calculated *p*-values are indicated.

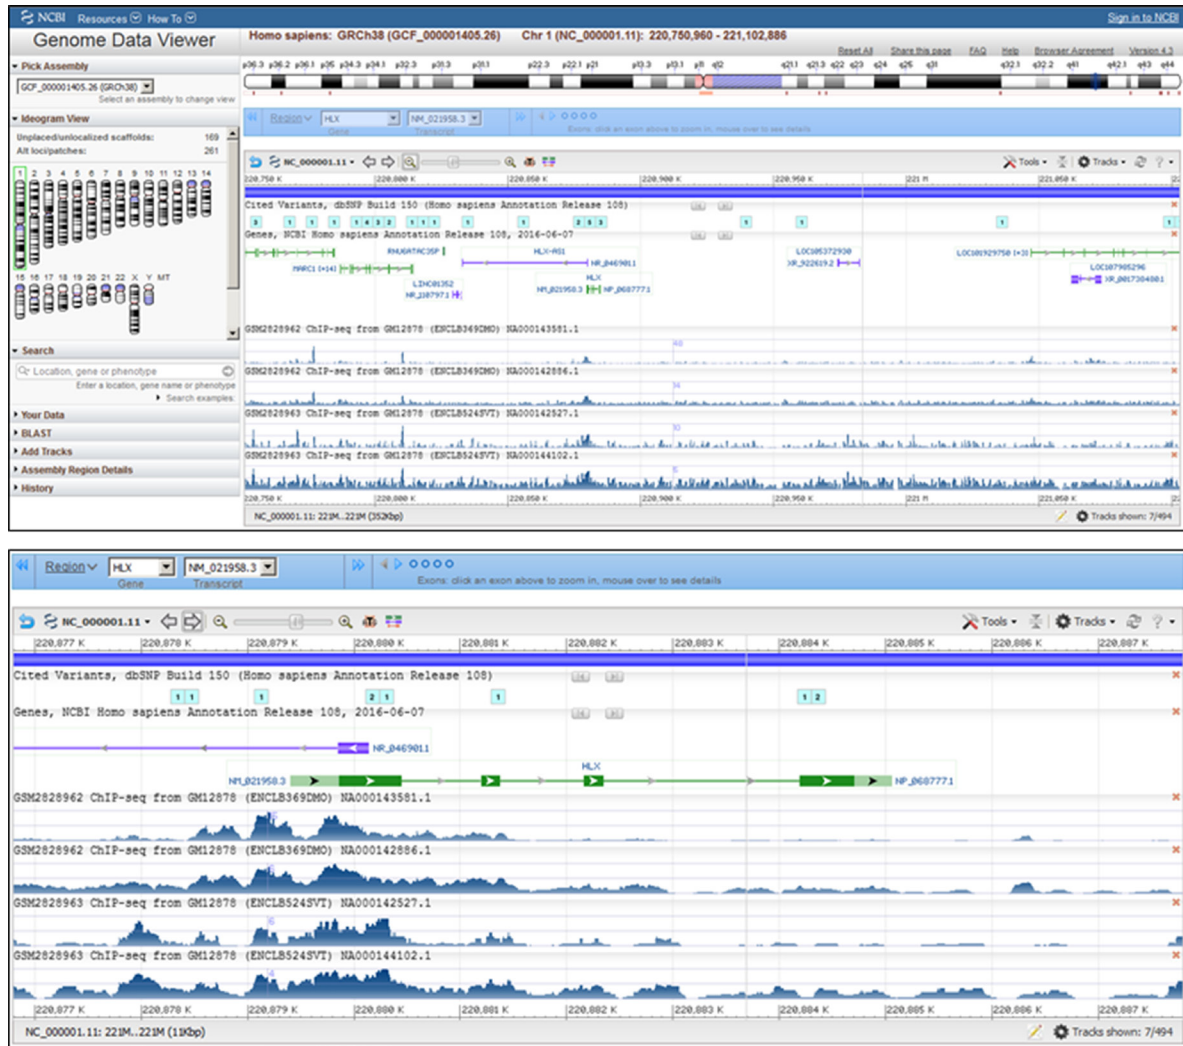

**Supplementary Figure 6: STAT3 ChIP-seq data.** Public Chip-seq dataset GM12878 obtained from the ENCODE project was analyzed for STAT3 binding, showing interaction at the HLX gene (above). The focused view (below) shows STAT3 binding in the promoter region of HLX.

**Supplementary Table 1: Comparative expression profiling.** See [Supplementary\\_Table\\_1](#)

**Supplementary Table 2: Comparative expression profiling.** See [Supplementary\\_Table\\_2](#)
